# Supplementary material for: Land-use change influence soil quality parameters at an ecologically fragile area of YongDeng County of Gansu Province, China
Source: PeerJ. 2021 Oct 27;9:e12246. doi: 10.7717/peerj.12246 (PMC8556711; doi:10.7717/peerj.12246)
Supplement: Supplemental Information 1 [file peerj-09-12246-s001.xlsx]

## Sheet: Sheet1
		Soil moisture					soil pH					Electrical Conductivity
	Land use types	1	2	3		Land use types	1	2	3		Land use types	1	2	3					The basic survey of land use type
	F	4.49	4.51	4.47		F	8.2	8.1	8.4		F	615	612	610		Sample Land	Number of surface vegetation species/species			Surface vegetation average density / (stand·m-2)			Surface vegetation average height / cm
	Q	1.37	1.29	1.38		Q	7.8	7.7	7.7		Q	150	148	153		Q	3.2	3.18	3.21	71.8	70.79	71.88	8.43	8.42	8.41
	G	0.98	0.96	0.94		G	7.9	7.6	7.7		G	155	151	152		G	4.4	4.39	4.4	54.6	53.61	55.43	8.64	8.63	8.61
	N	0.76	0.78	0.76		N	7.7	7.5	7.6		N	152	150	151		N	3.2	3.19	3.22	61.2	60.19	59.89	9.92	9.89	8.91
	Y	0.89	0.85	0.88		Y	7.6	7.6	7.5		Y	148	147	146		Y	2.4	2.41	2.39	83	82.01	81.23	7.18	7.16	7.17
		Organic carbon					Total nitrogen
	Land use types	1	2	3		Land use types	1	2	3
	F	4.2	4.3	3.9		F	0.68	0.66	0.69
	Q	5.2	4.9	5.1		Q	0.57	0.6	0.56
	G	3.2	3.4	3.1		G	0.3	0.29	0.31
	N	4.4	4.3	4.4		N	0.45	0.44	0.42
	Y	2.1	2.3	2.1		Y	0.28	0.27	0.29
		Coarse sand particles					Fine sand particles
	Land use types	1	2	3		Land use types	1	2	3
	F	18.84	18.79	18.95		F	28.96	28.83	28.82
	Q	24.01	24.19	23.85		Q	36.03	36.04	35.04
	G	24.34	23.78	22.09		G	37.63	36.88	35.42
	N	18.18	17.96	18.02		N	33.96	33.87	32.33
	Y	16.35	16.23	15.89		Y	46.35	45.77	46.31
		Very fine sand particles					Clay particle
	Land use types	1	2	3		Land use types	1	2	3
	F	40.86	40.78	41.04		F	11.3	10.86	11.23
	Q	33.41	32.98	33.01		Q	6.53	6.62	6.43
	G	32.02	32.01	33.01		G	6.02	6.01	6.01
	N	38.48	37.98	38.47		N	9.36	9.29	9.32
	Y	33.04	33.01	32.09		Y	4.25	4.28	4.21
